# Supplementary material
Source: HighWire-hosted journal article supplement (https://bmjpaedsopen.bmj.com/content/suppl/2024/06/08/10.1136.bmjpo-2023-002489)
Supplement: bmjpo-2023-002489supp002_data_supplement.pdf [file bmjpo-2023-002489supp002_data_supplement.pdf]

## How much does a Hospital Admission/Attendance to A&E cost you?

---

Thank you for taking part in our survey. You are a great help.

We are a team of researchers from the DIAMONDS study at the Great North Children's Hospital in Newcastle-upon-Tyne.

We know how much a child's admission to hospital/attendance to A&E costs the hospital, but we do not know how much it costs for you and your family.

We are looking for children and their families, to complete our survey on how much it costs you to be admitted to hospital/attend A&E. For example, how much do you spend on food and travel?

Please fill out this quick survey (10 minutes) to help us understand better how a hospital admission/attendance to A&E impacts you. Further information can be found on the patient information leaflet [link](#) here.

Thank you!

### Data protection and Confidentiality statement

This survey was created using CrowdSignal, approved by the Newcastle upon Tyne Hospitals NHS Foundation Trust for conducting surveys.

Data collected in this survey is anonymous, private, and confidential.

Survey data will be stored securely on the Newcastle upon Tyne Hospitals NHS Foundation Trust data storage systems, which are password protected and only accessible for the research team.

Personal data will be anonymised and not be share or published anywhere outside of the Trust, in accordance with the UK Policy Framework for Health and Social Care Research.

This project received funding under the European Union's Horizon2020 Research and Innovation programme, under grant agreement number 848196.

---

I have read and understood the information stated above about this survey and the patient information leaflet \*

☐ Yes

---

I understand participation is voluntary and I am free to withdraw at any time without giving any reason \*

☐ Yes

---

I agree to take part in this survey \*

☐ Yes

---

## Tell us a little bit about you

We need to know a little bit about you

What is your relationship to the patient?

- ☐ I am the patient
- ☐ I am the parent or caregiver

What is your postcode?

We would like to know your postcode to know how far you have come to visit the hospital (UK only)

How many times have you been admitted to hospital the last 12 months?

Now think about your admission to hospital/ attendance to A&E

How old are you/the patient currently (in years)?

How many hours (to the closest 4 hours) or days in total were you admitted to hospital or attend A&E for?

Who usually stays with you in hospital?

- ☐ Mother
- ☐ Father
- ☐ Carer
- ☐ Other:

How many times have you attended A&E in the last 12 months?

- ☐ 1
- ☐ 2
- ☐ 3
- ☐ 4
- ☐ 5
- ☐ 6
- ☐ 7
- ☐ 8
- ☐ 9
- ☐ 10
- ☐ more than 10 times

## The next questions are about costs for your admission or attendance to A&E

We understand hospital admissions can be expensive and we hope you would like to share how much this cost you.

Did you have any extra expenses during your child's admission to hospital or attendance to A&E?

☐ Yes

☐ No

What extra costs did you have during your admission/attendance to A&E? (Please tick all that apply)

☐ Transport (car, public transport, aeroplane, other)

☐ Food and Drinks (you bought)

☐ Childcare

☐ Clothes/toiletries

☐ Loss of earnings

Other:

Transport Costs

How do you get to hospital? \*

- ☐ Car/motorcycle
- ☐ Public transport
- ☐ Aeroplane
- ☐ Bicycle
- ☐ Walking

Other:

How much did you spend on petrol? (round up to nearest £5)

---

How much did you spend on parking? (round up to nearest £5)

Which public transport did you use?

☐ Train

☐ Bus

☐ Metro

☐ Taxi

Other:

---

How much did you spend on public transport? (round up to nearest £5)

How much did you spend on other transport costs? (round up to nearest £5)



**Food and Drinks costs**

---

How much extra money did you spend on food/drinks for your child?  
(round up to nearest £5)

---

How much extra money did you spend on food/drinks for yourself?  
(round up to nearest £5)

Childcare costs

During your admission/attendance to A&E, was childcare a problem?  
(e.g. for other brothers or sisters)

- ☐ Yes
- ☐ No, not needed/required

Comments:

How many other children required childcare?

How much did you spend on childcare? (round up to nearest £5)

Clothes and toiletries costs

How much extra money did you spend on clothes? (round up to nearest £5)

How much extra money did you spend on toiletries? (round up to nearest £5)

Loss of Earnings

You may have missed time at work because of your child's admission to hospital/attendance to A&E. Please let us know how much you lost, in earnings.

Who had loss of earnings during admission/attendance to A&E? \*

- ☐ The patient
- ☐ The parent/carer who stayed in hospital
- ☐ The other parent/carer
- ☐ Any other family members (please specify below)

Other:

Comments:

Did you or your family receive additional support during admission/attendance to A&E?

For example, from grandparents, friends, other carers, council

- ☐ Yes (please specify below what their costs were)
- ☐ No
- ☐ Prefer not to say

Comments:

Did this admission/attendance to A&E cause you or your family financial hardship?

- ☐ Yes (please explain below in what way)
- ☐ No
- ☐ Prefer not to say

Comments:

How much loss of earnings did the patient have? (round up to nearest £10)

How much loss of earnings did the parent/carer in hospital have?  
(round up to nearest £10)

How much loss of earnings did the other parent/care have? (round up to nearest £10)

---

How much loss of earnings did the other family member(s) have?  
(please round up to nearest £10)



How much loss of earnings did any other people have? (round up to nearest £10)

Were there any other ways this admission to hospital /attendance to A&E affected you or your family? (socially, financially, emontially)

---

The final questions! Congratulations on coming this far

This survey is part of the DIAMONDS study, an international study trying to discover new tests to diagnose fever quicker, ideally with a quick test available in the Emergency Department. Better and quicker diagnosis might shorten or prevent unplanned hospital admissions

Can you estimate how much money you would save if you did not have to stay/attendance to A&E hospital?

Please round up to the nearest £10

Thank you for completing our survey!

---

Is there anything else you would like to share with us or any extra costs you made that we might have missed?

If so, please specify below

---

If you have any queries or would like to withdraw your consent, please contact us!

Contact details:

Young Person's Advisory Group North England (YPAGne)

Great North Children's Hospital, Newcastle upon Tyne

0191-2825257

[website](#)

---
